# Supplementary material
Source: PubMed Central journal article supplement (PMC4118662)
Supplement: NIHMS573841-supplement-01.pdf [file NIHMS573841-supplement-01.pdf]

Type of file: figure

Label: Online Figure1

Filename: Online Figure I.tif

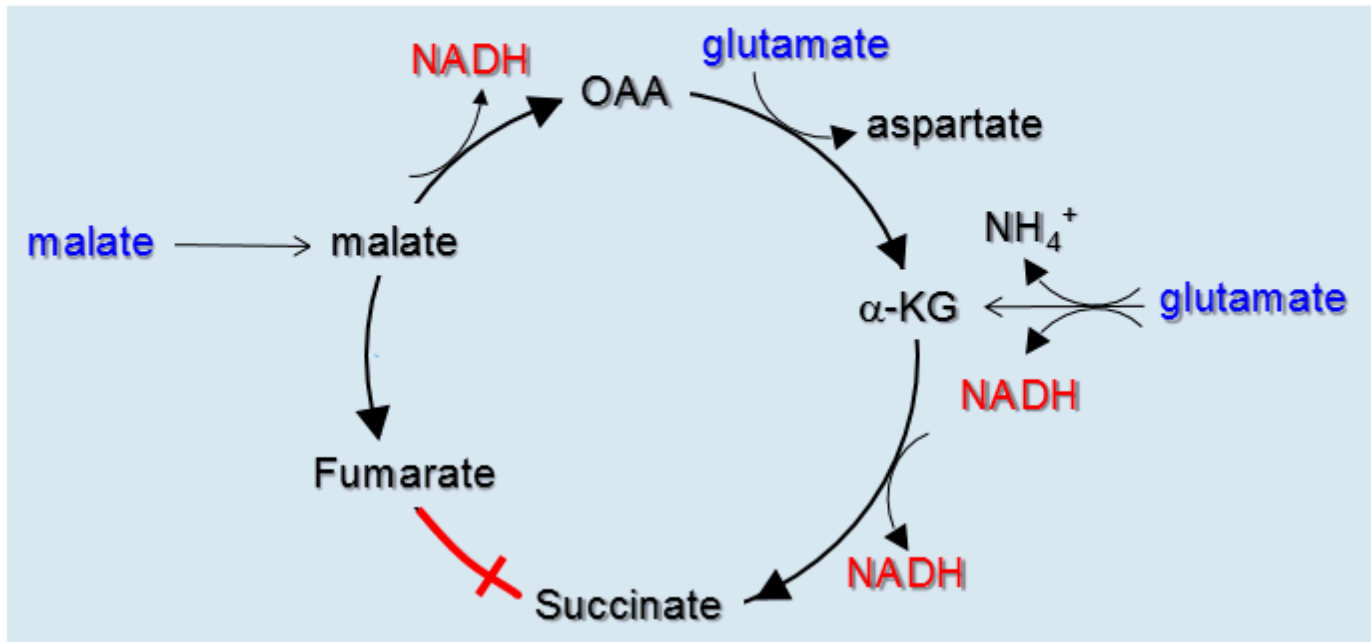

**Online Figure I.** Substrate combination of glutamate plus malate activates malate-aspartate shuttle and dehydrogenases of Krebs Cycle with reduction of  $\text{NAD}^+$  to NADH, then feeding electrons into complex I and down the thermodynamic cascade through complex III to complex IV to  $\text{O}_2$ . Malate dehydrogenase oxidize malate to oxaloacetate (OAA) through reduction of  $\text{NAD}^+$  to NADH. Glutamate and transaminase are responsible for the metabolism of oxaloacetate and  $\alpha$ -ketoglutarate ( $\alpha$ -KG), and reduction of  $\text{NAD}^+$  to NADH. Complex II is not involved in respiration on glutamate + malate in isolated mitochondria because high added malate concentration equilibrates with fumarate as catalyzed by fumarase, which inhibits flux of succinate to fumarate. Therefore, substrate combination of glutamate plus malate is used to drive NADH-linked respiration.
